# Supplementary material for: Capsular polysaccharide restrains type VI secretion in Acinetobacter baumannii
Source: eLife journal article supplement (doi:10.7554/elife.101032), 2025-01-03

Figure 5-supplement 1B – source data-annotated

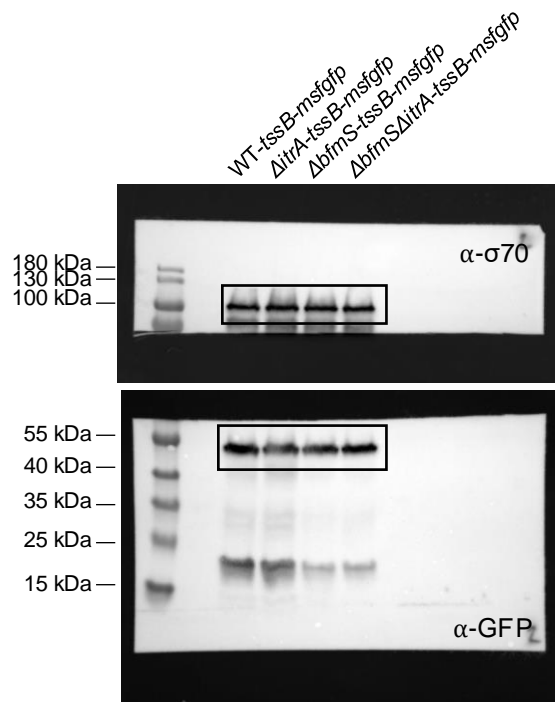

Supplement: supp [file elife-101032-supp-v1.zip]
