# Supplementary material for: Capsular polysaccharide restrains type VI secretion in Acinetobacter baumannii
Source: eLife journal article supplement (doi:10.7554/elife.101032), 2025-01-03
Supplement: supp [file elife-101032-supp-v1.zip]

Figure 2B– source data-annotated

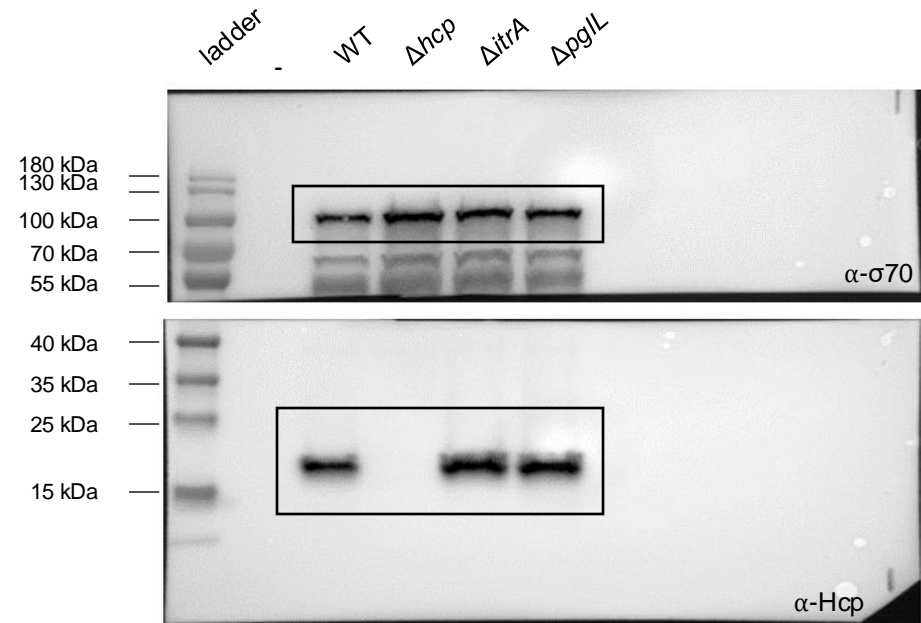

Cell lysate (CL)

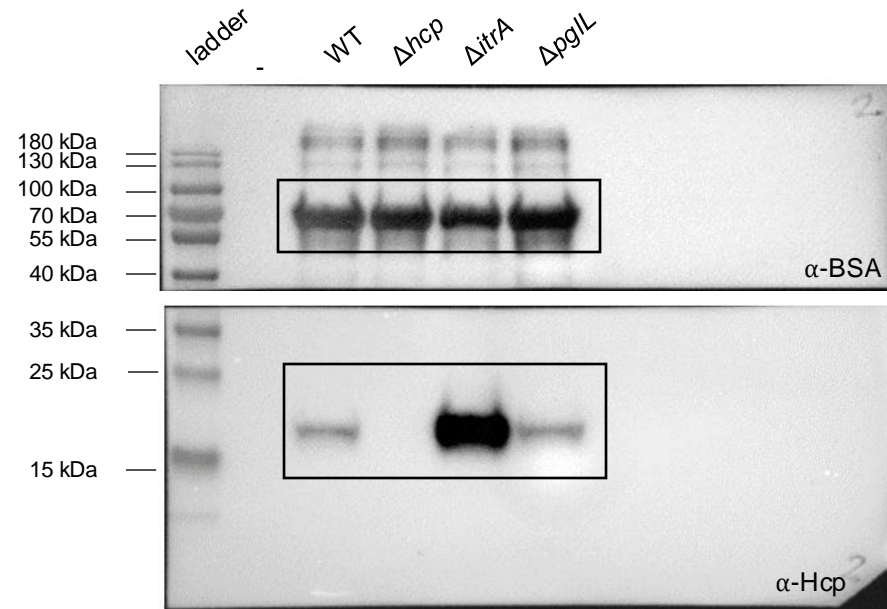

Supernatant (Sup)
