# Supplementary material for: Capsular polysaccharide restrains type VI secretion in Acinetobacter baumannii
Source: eLife. 2025 Jan 3;14:e101032. doi: 10.7554/eLife.101032 (PMC11731876; doi:10.7554/eLife.101032)
Supplement: Supplementary file 2. [file elife-101032-supp2.xlsx]

## Sheet: oligonucleotides used
Supplementary File 2
Primer name	Sequence (5'-3')	Comment	Internal number
1-SbfI-KO-HN027-17070	CACACCTGCAGGGTAATAGTAAATGGTTCGGGGG	For itrA deletion construct [for A118ΔitrA; MB#11161]	140/45
2-KO-HN027-17070	GACTACCAGTTAGACAATATCTGTTATACGC		129/17
3-KO-HN027-17070	GTCTAACTGGTAGTCAGAAAAAAG		129/18
4-SacI-KO-HN027-17070	CACAGAGCTCCCACAATCAAACGTTTGACC		140/46
hcp1-SbfI-1-new	GCCCTGCAGGGAAGCGAAAGAAC ACCATTCGTTGTAGG	For hcp deletion construct [for A118Δhcp; MB#11160]	82/56
Hcp1-AB-2-new	CACCTTTAGCAGTCAACCTTTGTGCTCAGAATCACGAGATTCTCC		84/35
Hcp1-AB-5-new	AGCACAAAGGTTGACTGCTAAAGGTGCTGTTACTAAGAAATGG		84/34
hcp1-XbaI-6-new	GCTCTAGAAATGGCACGTCTCGCCAAGCTACTATC		82/57
TnAraC-NdeI-itra-A118	CACACATATGAAGCGTATAACAGATATTGTCATAGC	Amplification of itrA for the insertion in pGP704 with mini-Tn7 carrying araC and PBAD-driven itrA; [for A118ΔhcpΔitrA-Tn-itrA; MB#11163]	145/7
TnAraC-kpnI-itra-A118	CACAGGTACCTTAATATTGTATTTCATCTTTTTTCTGACTACC		145/8
1-AatII-H0N27_11100-sfGFP	CACAGACGTCCTCGGAAAGCAGTTCTACTG	Amplification of tssB-msfgfp to replace tssB at its native locus; the insert was amplified using genomic DNA of strain LLB832 from Lin et al., 2022 as template [for A118Δhcp; MB#11201]	140/26
4-AvrII-H0N27_11100-sfGFP	CACACCTAGGCCCTCTTTTGGATGATATGGGAGACGAC		140/29
KO-HN027_11100_AB01	CTCTTGGTCTGAGCCATTAC	For tssB deletion construct [for A118ΔtssB::FRT-kan-FRT2; MB#11199]	135/6
KO-HN027_11100_AB02	CTCCAGCCTACGCTTAAGCCATAAGATTCTATTCCGG		135/7
Kan_AB_03	TAAGCGTAGGCTGGAGCTGCTTCGAAGTTCC		130/12
Kan_AB_04	CGGATGAATATCCTCCTTAGTTCC		130/13
KO-HN027_11100_AB05	GGAGGATATTCATCCGTAAATTAAGTGCGGAGG		135/8
KO-HN027_11100_AB06	CTCTTTTTCACGGCGATCC		135/9
1-AatII-KO-H0N27/28_03545	CACAGACGTCGGGGCAATGATATGAGCCAAG	For wzc substitution construct [for A118Δwzc[K547Q]; MB#11197]	129/5
2-KO-H0N27/28_03545	GGCGGTTGTTACAGTAAATACCCAAAAACAG		129/6
3-KO-H0N27/28_03545	CTGTAACAACCGCCATTAAAGACC		129/7
4-SacI-KO-H0N27/28_03545	CACAGAGCTCGATAGAGCCTTACAGACCTG		129/8
1-AatII-H0N27_17125_K547Q	CACAGACGTCGGCAGCAAAATATACGGCTG	For bfmS deletion construct [for A118ΔbfmS; MB#11195]	140/33
2-H0N27_17125_K547Q	GAAATAAACGACTGACCCACTTCAGGAGAGGGA		140/36
3-H0N27_17125_K547Q	TGAAGTGGGTCAGTCGTTTATTTCAACTAACTTGGCAAC		140/37
4-AvrII-H0N27_17125_K547Q	CACACCTAGGGCATGCTTCGACTTAAGC		140/38
1-glms-AB	CCGTTATCGCTCACCAGTGATTGTGG	For insertion of the upstream intergenic region (77 bp) of bfmS between glmS and murI [for A118-glmS-P[bfmS]; MB#11194]	156/6
2-PbfmS-empty	CCTTAACGTAACAACAAGAATTACCAGCCCCGC		156/7
3-PbfmS-empty-apra	GTTGTTACGTTAAGGGATTTTGGTCATGAG		156/8
4-murI-AB	GATTCTGGTTTAGGCGGGTTGTCTC		156/9
1-glms-AB	CCGTTATCGCTCACCAGTGATTGTGG	For insertion of the upstream intergenic region (77 bp) of bfmS and bfmS between glmS and murI [for A118-glmS-P[bfmS]; MB#11191]	156/6
2-PbfmS-empty	CCTTAACGTAACAACAAGAATTACCAGCCCCGC		156/7
3-glmS-bfmS-native	CTATTAAGGCATCACCTGCCTTCCTATAAGGTTGGTCGAG		146/51
4-bfmS-native-apra	CCAAAATCCCTTAACGTCACCTTATGCAGGTGCTT		146/52
1-ΔclpP::FRT-KAN-FRT	CATGGAACGTGAAGTTCGCAATGGTTTACGTAACCAAG	For clpXP deletion construct [for A118ΔclpXP::FRT-kan-FRT2; MB#11170]	157/58
2-ΔclpP::FRT-KAN-FRT	GCAGCTCCAGCCTACGCTTATGGAACATACATACGTTATTTATTCC		157/59
Kan_AB_03	TAAGCGTAGGCTGGAGCTGCTTCGAAGTTCC		130/12
Kan_AB_04	CGGATGAATATCCTCCTTAGTTCC		130/13
5-ΔclpX::FRT-KAN-FRT	GGAGGATATTCATCCGCATGAAAGTGTTGCTAAGGC		157/66
6-ΔclpX::FRT-KAN-FRT	CATAAATGGACCCGTGTGCTCACTACGGTCC		157/67
1-Δlon::FRT-KAN-FRT	CAGAGGTTGCAACCCATGCTCCAATCGAAGCATTCC	For lon deletion construct [for A118Δlon::FRT-kan-FRT2; MB#11179]	157/52
2-Δlon::FRT-KAN-FRT	GCAGCTCCAGCCTACGCTTACATGGGCACTCCTAATGAGTGAC		157/53
Kan_AB_03	TAAGCGTAGGCTGGAGCTGCTTCGAAGTTCC		130/12
Kan_AB_04	CGGATGAATATCCTCCTTAGTTCC		130/13
5-Δlon::FRT-KAN-FRT	GGAGGATATTCATCCGCTTCGATGCCAAAGCCTTTACC		157/54
6-Δlon::FRT-KAN-FRT	GGGTGTGGCATGGTAAGTTTTGAAAGTGACCAGTGCC		157/55
1-XbaI-del-pglL	CACATCTAGAGATCGTGGTTGCTATTATCGG	For pglL deletion construct [for A118ΔpglL; MB#12021]	182/71
2-del-pglL	GCTGTCGTTAGAATACTTGCATAGTGAGAGG		182/72
3-del-pglL	GTATTCTAACGACAGCAAATAACTTTGGCAGAG		182/73
4-sacI-del-pglL	CACAGAGCTCGCTACAATGAAAGGCAATCGTG		182/74
1-sacI-HN027_11090	CACAGAGCTCATGAAAGATATATACGTTGAGTTTCGCGG	For insertion of hcp in pMMB67EH plasmid [for pMMBEH-hcp; MB#11175]	142/4
2-sbfI-HN027_11090	CACACCTGCAGGTTACGCTGCGTAAGAAGCTGTATTATTAG		142/5
1-QC-pMMB-hcp-CTD11	CTAAGAAATGGTAACCTGCAGGCATGCAAGCTTGGCTGTTTTG	For insertion of hcpCTDΔ11 in pMMB67EH plasmid [for pMMB67EH-hcpCTDΔ11; MB#12027]	185/49
2-QC-pMMB-hcp-CTD11	CTGCAGGTTACCATTTCTTAGTAACAGCACCTTTAGCAGTAC		185/50
1-QC-pMMB-hcp-CTD-DD	CTTACGATGACTAACCTGCAGGCATGCAAGCTTGGCTGTTTTG	For insertion of hcp[A166D/A167D] in pMMB67EH plasmid [for pMMBEH-hcp[A166D/A167D]; MB#12028]	185/53
2-QC-pMMB-hcp-CTD-DD	CTGCAGGTTAGTCATCGTAAGAAGCTGTATTATTAGAAAG		185/54
