# Supplementary material for: Capsular polysaccharide restrains type VI secretion in Acinetobacter baumannii
Source: eLife. 2025 Jan 3;14:e101032. doi: 10.7554/eLife.101032 (PMC11731876; doi:10.7554/eLife.101032)
Supplement: Supplementary file 3. [file elife-101032-supp3.xlsx]

## Sheet: Figure 1
Figure 1
Figure 1A-source data	Provided as Figure 1—source data 1 and Figure 1—source data 2
Figure 1B-source data - A. baumannii	R1 (CFU/mL)	R2 (CFU/mL)	R3 (CFU/mL)
Mock WT	140000000	130000000	260000000
serum WT	15000000	35000000	92000000
HI-serum WT	260000000	160000000	370000000
Mock ΔitrA	220000000	130000000	60000000
serum ΔitrA	26000	39000	31000
HI-serum ΔitrA	180000000	40000000	180000000
Figure 1C-source data - A. baumannii	R1 (CFU/mL)	R2 (CFU/mL)	R3 (CFU/mL)
E. cloacae T6SS+ vs A.baumannii T6SS- (∆hcp) + Tn	25000000	40000000	23000000
E. cloacae T6SS- vs A.baumannii T6SS- (∆hcp) + Tn	310000000	64000000	100000000
E. cloacae T6SS+ vs A.baumannii T6SS- (∆hcp) ∆itrA + Tn	200	200	200
E. cloacae T6SS- vs A.baumannii T6SS- (∆hcp) ∆itrA + Tn	40000000	15000000	40000000
E. cloacae T6SS+ vs A.baumannii T6SS- (∆hcp) ∆itrA + Tn-itrA	16000000	72000000	6000000
E. cloacae T6SS- vs A.baumannii T6SS- (∆hcp) ∆itrA + Tn-itrA	170000000	28000000	80000000
Figure 1D-source data - A. baumannii	R1 (CFU/mL)	R2 (CFU/mL)	R3 (CFU/mL)
E. cloacae T6SS+ vs A.baumannii T6SS+	240000000	160000000	220000000
E. cloacae T6SS- vs A.baumannii T6SS+	180000000	160000000	300000000
E. cloacae T6SS+ vs A.baumannii T6SS+ ∆itrA	140000000	100000000	80000000
E. cloacae T6SS- vs A.baumannii T6SS+ ∆itrA	180000000	220000000	160000000

## Sheet: Figure 2
Figure 2
Figure 2A-source data - E. coli	R1 (CFU/mL)	R2 (CFU/mL)	R3 (CFU/mL)
1:1 ratio A. baumannii WT vs E. coli	200	200	200
1:1 ratio A. baumannii Δhcp vs E. coli	500000000	65000000	75000000
1:1 ratio A. baumannii ΔitrA vs E. coli	200	200	200
1:1 ratio A. baumannii ΔpglL vs E. coli	400	200	200
1:5 ratio A. baumannii WT vs E. coli	22000	47000	22000
1:5 ratio A. baumannii Δhcp vs E. coli	97000000	78000000	180000000
1:5 ratio A. baumannii ΔitrA vs E. coli	200	200	200
1:5 ratio A. baumannii ΔpglL vs E. coli	5400	10000	26000
Figure 2B-source data	Provided as Figure 2—source data 1 and Figure 2—source data 2
Figure 2C-source data	Available at doi: 10.5281/zenodo.14386836
Figure 2D-source data	no T6SS structure	>1 T6SS structures/cell
R1 WT TssB-msfGFP	62	903
R1 ΔitrA TssB-msfGFP	40	831
R2 WT TssB-msfGFP	39	966
R2 ΔitrA TssB-msfGFP	8	1087
R3 WT TssB-msfGFP	7	855
R3 ΔitrA TssB-msfGFP	7	858

## Sheet: Figure 3
Figure 3
Figure 3A-source data - A. baumannii	R1 (CFU/mL)	R2 (CFU/mL)	R3 (CFU/mL)
Mock WT	140000000	270000000	150000000
serum WT	69000000	50000000	20000000
HI-serum WT	170000000	290000000	400000000
Mock ΔitrA	120000000	80000000	100000000
serum ΔitrA	59000	6000	27000
HI-serum ΔitrA	150000000	360000000	160000000
Mock ΔbfmS	250000000	220000000	280000000
serum ΔbfmS	330000000	750000000	280000000
HI-serum ΔbfmS	380000000	480000000	340000000
Mock ΔbfmSΔitrA	170000000	190000000	170000000
serum ΔbfmSΔitrA	16000	2000	22000
HI-serum ΔbfmSΔitrA	180000000	290000000	130000000
Mock wzc[K547Q]	100000000	60000000	80000000
serum wzc[K547Q]	14000	12000	14000
HI-serum wzc[K547Q]	240000000	180000000	220000000
Figure 3B-source data	Provided as Figure 3—source data 1 and Figure 3—source data 2
Figure 3C-source data - E. coli	R1 (CFU/mL)	R2 (CFU/mL)	R3 (CFU/mL)
WT vs E. coli	43000	140000	18000
Δhcp vs E. coli	500000000	43000000	180000000
ΔitrA vs E. coli	600	1000	200
ΔbfmS vs E. coli	140000000	78000000	120000000
ΔbfmSΔitrA vs E. coli	200	600	200
wzc[K547Q] vs E. coli	160000	64000	38000
Figure 3D-source data	Provided as Figure 3—source data 3 and Figure 3—source data 4
Figure 3E-source data	Available at doi: 10.5281/zenodo.14386836

## Sheet: Figure 4
Figure 4
Figure 4A-source data	Provided as Figure 4—source data 1 and Figure 4—source data 2
Figure 4B-source data	Provided as Figure 4—source data 3 and Figure 4—source data 4
Figure 4C-source data - E. coli CmR	condition	R1 (CFU/mL)	R2 (CFU/mL)	R3 (CFU/mL)
WT vs E. coli CmR ratio 1:1	LB	1300	200	200
ΔitrA vs E. coli CmR ratio 1:1	LB	200	1300	200
ΔtssB vs E. coli CmR ratio 1:1	LB	67000000	100000000	85000000
ΔbfmS vs E. coli CmR ratio 1:1	LB	3000000	22000000	3200000
WT vs E. coli CmR ratio 1:1	LB+Cm	4300000	1320000	860000
ΔitrA vs E. coli CmR ratio 1:1	LB+Cm	2200	1700	4200
ΔtssB vs E. coli CmR ratio 1:1	LB+Cm	51000000	34000000	28000000
ΔbfmS vs E. coli CmR ratio 1:1	LB+Cm	9700000	3000000	5200000
WT vs E. coli CmR ratio 5:1	LB	200	200	200
ΔitrA vs E. coli CmR ratio 5:1	LB	200	200	200
ΔtssB vs E. coli CmR ratio 5:1	LB	42000000	270000000	820000000
ΔbfmS vs E. coli CmR ratio 5:1	LB	920000	89000000	26000000
WT vs E. coli CmR ratio 5:1	LB+Cm	8500000	4500000	1010000
ΔitrA vs E. coli CmR ratio 5:1	LB+Cm	200	200	200
ΔtssB vs E. coli CmR ratio 5:1	LB+Cm	31000000	40000000	41000000
ΔbfmS vs E. coli CmR ratio 5:1	LB+Cm	24000000	44000000	26000000

## Sheet: Figure 5
Figure 5
Figure 5A-source data	Available at doi: 10.5281/zenodo.14386836
Figure 5B-source data	no T6SS structure	>1 T6SS structures/cell
R1 WT TssB-msfGFP	2	724
R1 ΔitrA TssB-msfGFP	1	943
R1 ΔtslA TssB-msfGFP	623	236
R1 ΔbfmS TssB-msfGFP	588	403
R1 ΔbfmSΔitrA TssB-msfGFP	36	969
R2 WT TssB-msfGFP	2	1192
R2 ΔitrA TssB-msfGFP	18	918
R2 ΔtslA TssB-msfGFP	763	126
R2 ΔbfmS TssB-msfGFP	553	731
R2 ΔbfmSΔitrA TssB-msfGFP	36	2062
R3 WT TssB-msfGFP	29	1092
R3 ΔitrA TssB-msfGFP	4	801
R3 ΔtslA TssB-msfGFP	937	118
R3 ΔbfmS TssB-msfGFP	630	762
R3 ΔbfmSΔitrA TssB-msfGFP	32	1665
Figure 5C-source data - E. coli	R1 (CFU/mL)	R2 (CFU/mL)	R3 (CFU/mL)
WT vs E. coli	600	200	400
Δhcp vs E. coli	57000000	52000000	38000000
ΔitrA vs E. coli	200	200	200
ΔtslA vs E. coli	280000	66000	320000
ΔbfmS vs E. coli	35000000	1.05333e+07	22000000
ΔbfmSΔitrA vs E. coli	1200	600	200
Figure 5D-source data	Provided as Figure 5—source data 1 and Figure 5—source data 2

## Sheet: Figure 6
Figure 6
Figure 6A-source data	Provided as Figure 6—source data 1 and Figure 6—source data 2
Figure 6B-source data	Provided as Figure 6—source data 3 and Figure 6—source data 4
Figure 6C-source data	Provided as Figure 6—source data 5 and Figure 6—source data 6
Figure 6D-source data
Sample Name	Gene Name	Cq	Ratio
WT 2h / R1	gyrA	19.51	-
WT 2h / R1	hcp	15.17	3.648E+1
DtssB 2h / R1	gyrA	19.28	-
DtssB 2h / R1	hcp	17.32	8.345E+0
WT 4h / R1	gyrA	22.94	-
WT 4h / R1	hcp	14.84	4.339E+2
DtssB 4h / R1	gyrA	23.62	-
DtssB 4h / R1	hcp	17.58	1.262E+2
WT 6h / R1	gyrA	22.35	-
WT 6h / R1	hcp	17.80	4.750E+1
DtssB 6h / R1	gyrA	21.84	-
DtssB 6h / R1	hcp	19.21	1.423E+1
WT 7h / R1	gyrA	21.70	-
WT 7h / R1	hcp	16.22	8.162E+1
DtssB 7h / R1	gyrA	22.90	-
DtssB 7h / R1	hcp	17.41	8.694E+1
WT 8h / R1	gyrA	21.18	-
WT 8h / R1	hcp	15.66	8.161E+1
DtssB 8h / R1	gyrA	20.27	-
DtssB 8h / R1	hcp	17.41	1.522E+1
WT 9h / R1	gyrA	21.60	-
WT 9h / R1	hcp	17.77	2.944E+1
DtssB 9h / R1	gyrA	22.82	-
DtssB 9h / R1	hcp	17.50	7.801E+1
WT 10h / R1	gyrA	22.42	-
WT 10h / R1	hcp	19.19	2.116E+1
DtssB 10h / R1	gyrA	21.58	-
DtssB 10h / R1	hcp	18.86	1.486E+1
WT 11h / R1	gyrA	22.78	-
WT 11h / R1	hcp	18.82	3.372E+1
DtssB 11h / R1	gyrA	22.64	-
DtssB 11h / R1	hcp	20.00	1.487E+1
WT 12h / R1	gyrA	23.51	-
WT 12h / R1	hcp	19.70	3.184E+1
DtssB 12h / R1	gyrA	22.65	-
DtssB 12h / R1	hcp	21.55	5.770E+0
WT 14h / R1	gyrA	22.08	-
WT 14h / R1	hcp	18.37	2.797E+1
DtssB 14h / R1	gyrA	22.54	-
DtssB 14h / R1	hcp	21.17	6.777E+0
WT 16h / R1	gyrA	23.90	-
WT 16h / R1	hcp	22.51	7.319E+0
DtssB 16h / R1	gyrA	24.18	-
DtssB 16h / R1	hcp	22.80	7.371E+0
WT 2h / R2	gyrA	20.85	-
WT 2h / R2	hcp	15.92	5.588E+1
DtssB 2h / R2	gyrA	20.99	-
DtssB 2h / R2	hcp	16.50	4.292E+1
WT 4h / R2	gyrA	22.73	-
WT 4h / R2	hcp	15.81	2.078E+2
DtssB 4h / R2	gyrA	23.27	-
DtssB 4h / R2	hcp	17.39	1.125E+2
WT 6h / R2	gyrA	23.94	-
WT 6h / R2	hcp	18.09	1.140E+2
DtssB 6h / R2	gyrA	23.89	-
DtssB 6h / R2	hcp	18.32	9.572E+1
WT 7h / R2	gyrA	23.13	-
WT 7h / R2	hcp	16.99	1.311E+2
DtssB 7h / R2	gyrA	23.13	-
DtssB 7h / R2	hcp	19.37	3.032E+1
WT 8h / R2	gyrA	22.90	-
WT 8h / R2	hcp	17.62	7.640E+1
DtssB 8h / R2	gyrA	23.55	-
DtssB 8h / R2	hcp	18.42	7.185E+1
WT 9h / R2	gyrA	22.21	-
WT 9h / R2	hcp	17.76	4.437E+1
DtssB 9h / R2	gyrA	22.61	-
DtssB 9h / R2	hcp	19.03	2.648E+1
WT 10h / R2	gyrA	22.48	-
WT 10h / R2	hcp	20.55	9.537E+0
DtssB 10h / R2	gyrA	23.11	-
DtssB 10h / R2	hcp	20.48	1.512E+1
WT 11h / R2	gyrA	23.63	-
WT 11h / R2	hcp	20.79	1.763E+1
DtssB 11h / R2	gyrA	23.31	-
DtssB 11h / R2	hcp	22.16	6.139E+0
WT 12h / R2	gyrA	23.74	-
WT 12h / R2	hcp	19.99	3.102E+1
DtssB 12h / R2	gyrA	23.93	-
DtssB 12h / R2	hcp	20.34	2.837E+1
WT 14h / R2	gyrA	23.30	-
WT 14h / R2	hcp	20.80	1.408E+1
DtssB 14h / R2	gyrA	23.45	-
DtssB 14h / R2	hcp	20.54	1.825E+1
WT 16h / R2	gyrA	25.39	-
WT 16h / R2	hcp	23.49	1.075E+1
DtssB 16h / R2	gyrA	24.72	-
DtssB 16h / R2	hcp	23.77	5.805E+0
WT 2h/R3	gyrA	24.45	-
WT 2h/R3	hcp	19.27	7.733E+1
DtssB 2h/R3	gyrA	23.92	-
DtssB 2h/R3	hcp	18.32	9.764E+1
WT 4h/R3	gyrA	28.93	-
WT 4h/R3	hcp	20.87	5.626E+2
DtssB 4h/R3	gyrA	26.23	-
DtssB 4h/R3	hcp	20.31	1.327E+2
WT 6h/R3	gyrA	30.33	-
WT 6h/R3	hcp	24.04	2.024E+2
DtssB 6h/R3	gyrA	26.23	-
DtssB 6h/R3	hcp	21.31	7.171E+1
WT 7h/R3	gyrA	29.40	-
WT 7h/R3	hcp	23.67	1.372E+2
DtssB 7h/R3	gyrA	27.77	-
DtssB 7h/R3	hcp	23.50	5.173E+1
WT 8h/R3	gyrA	29.33	-
WT 8h/R3	hcp	25.20	5.111E+1
DtssB 8h/R3	gyrA	27.67	-
DtssB 8h/R3	hcp	24.29	2.978E+1
WT 9h/R3	gyrA	26.49	-
WT 9h/R3	hcp	23.24	2.599E+1
DtssB 9h/R3	gyrA	30.16	-
DtssB 9h/R3	hcp	27.51	2.139E+1
WT 10h/R3	gyrA	24.61	-
WT 10h/R3	hcp	22.65	1.075E+1
DtssB 10h/R3	gyrA	27.54	-
DtssB 10h/R3	hcp	24.12	3.033E+1
WT 11h/R3	gyrA	25.14	-
WT 11h/R3	hcp	23.13	1.137E+1
DtssB 11h/R3	gyrA	30.65	-
DtssB 11h/R3	hcp	27.23	3.516E+1
WT 12h/R3	gyrA	24.74	-
WT 12h/R3	hcp	22.89	1.011E+1
DtssB 12h/R3	gyrA	29.23	-
DtssB 12h/R3	hcp	27.15	1.441E+1
WT 14h/R3	gyrA	28.91	-
WT 14h/R3	hcp	27.68	8.415E+0
DtssB 14h/R3	gyrA	29.49	-
DtssB 14h/R3	hcp	26.68	2.286E+1
WT 16h/R3	gyrA	29.06	-
WT 16h/R3	hcp	27.76	8.848E+0
DtssB 16h/R3	gyrA	30.51	-
DtssB 16h/R3	hcp	30.60	4.031E+0

## Sheet: Figure 7
Figure 7
Figure 7A-source data
Sample Name	Gene Name	Cq	Ratio
WT + p / R1	gyrA	24.54	-
WT + p-hcp / R1	gyrA	24.12	-
Dhcp + p / R1	gyrA	24.96	-
Dhcp + p-hcp / R1	gyrA	24.24	-
WT + p / R1	hcp	19.85	5.745E+1
WT + p-hcp / R1	hcp	17.19	2.234E+2
Dhcp + p / R1	hcp	29.95	1.520E-1
Dhcp + p-hcp / R2	hcp	17.32	2.233E+2
WT + p / R2	gyrA	31.38	-
WT + p-hcp / R2	gyrA	31.04	-
Dhcp + p / R2	gyrA	28.89	-
Dhcp + p-hcp / R2	gyrA	26.08	-
WT + p / R2	hcp	27.80	4.016E+1
WT + p-hcp / R2	hcp	23.15	5.602E+2
Dhcp + p / R2	hcp	30.39	1.568E+0
Dhcp + p-hcp / R2	hcp	19.49	1.989E+2
WT + p / R3	gyrA	27.28	-
WT + p-hcp /R3	gyrA	25.33	-
Dhcp + p /R3	gyrA	29.96	-
Dhcp + p-hcp /R3	gyrA	24.93	-
WT + p / R3	hcp	20.44	2.456E+2
WT + p-hcp /R3	hcp	18.19	2.693E+2
Dhcp + p /R3	hcp	-	0.000E+0
Dhcp + p-hcp /R3	hcp	19.31	1.037E+2
Figure 7B-source data	Provided as Figure 7—source data 1 and Figure 7—source data 2
Figure 7C-source data	Provided as Figure 7—source data 3 and Figure 7—source data 4
Figure 7D-source data	Provided as Figure 7—source data 5 and Figure 7—source data 6

## Sheet: Figure 1-figure supplement 1
Figure 1-figure supplement 1
Figure 1-figure supplement 1B-source data - E.coli	R1 (CFU/mL)	R2 (CFU/mL)	R3 (CFU/mL)
WT vs E. coli	600	1800	400
tssB-msfgfp vs E. coli	200	200	2200
Δhcp vs E. coli	48000000	18000000	36000000
ΔtssB vs E. coli	23000000	34000000	45000000
Figure 1-figure supplement 1C-source data - A. baumannii	R1 (CFU/mL)	R2 (CFU/mL)	R3 (CFU/mL)
E. cloacae T6SS+ vs A. baumannii WT	160000000	710000000	470000000
E. cloacae T6SS+ vs A. baumannii Δhcp	200000000	160000000	94000000
E. cloacae T6SS+ vs A. baumannii ΔitrA	60000000	540000000	94000000
E. cloacae T6SS+ vs A. baumannii ΔhcpΔitrA	400	200	2200
E. cloacae T6SS- vs A. baumannii WT	180000000	290000000	510000000
E. cloacae T6SS- vs A. baumannii Δhcp	420000000	380000000	530000000
E. cloacae T6SS- vs A. baumannii ΔitrA	500000000	380000000	500000000
E. cloacae T6SS- vs A. baumannii ΔhcpΔitrA	220000000	240000000	400000000
Figure 1-figure supplement 1D-source data - E. cloacae	R1 (CFU/mL)	R2 (CFU/mL)	R3 (CFU/mL)
E. cloacae T6SS+ vs A. baumannii WT	7400000	450000	230000
E. cloacae T6SS+ vs A. baumannii Δhcp	320000000	310000000	320000000
E. cloacae T6SS+ vs A. baumannii ΔitrA	860000	42000	190000
E. cloacae T6SS+ vs A. baumannii ΔhcpΔitrA	180000000	620000000	690000000
E. cloacae T6SS- vs A. baumannii WT	900000	430000	180000
E. cloacae T6SS- vs A. baumannii Δhcp	180000000	490000000	400000000
E. cloacae T6SS- vs A. baumannii ΔitrA	9000	6000	3100
E. cloacae T6SS- vs A. baumannii ΔhcpΔitrA	220000000	80000000	480000000

## Sheet: Figure 3-figure supplement 1
Figure 3-figure supplement 1
Figure 3-figure supplement 1A and B-source data	Provided as Figure 3-supplement 1A and 1B
Figure 3-figure supplement 1C-source data - E.coli	R1 (CFU/mL)	R2 (CFU/mL)	R3 (CFU/mL)
WT vs E. coli	200	200	200
Δhcp vs E. coli	4200000	71000000	26000000
ΔbfmS vs E. coli	15000000	13000000	8000000
ΔbfmS::bfmS vs E. coli	200	200	400
Figure 3-figure supplement 1D-source data	Provided as Figure 3-supplement 1—source data 1 and Figure 3-supplement 1—source data 2
Figure 3-figure supplement 1E-source data	Provided as Figure 3-supplement 1—source data 3 and Figure 3-supplement 1—source data 4
Figure 3-figure supplement 1F-source data	R1 (CFU/mL)	R2 (CFU/mL)	R3 (CFU/mL)
A118 WT vs E. coli	2400	200	200
A118 ΔtssB vs E. coli	27000000	70000000	55000000
A118 ΔbfmS vs E. coli	4200000	3100000	19000000
29D2 WT vs E. coli	1300	200	400
29D2 ΔtssB vs E. coli	28000000	69000000	87000000
29D2 ΔbfmS vs E. coli	4000000	3600000	1020000
86II2C WT vs E. coli	1600	30000	53000
86II2C ΔtssB vs E. coli	40000000	53000000	51000000
86II2C ΔbfmS vs E. coli	54000000	80000000	42000000

## Sheet: Figure 5-figure supplement 1
Figure 5-figure supplement 1
Figure 5-figure supplement 1A-source data
Total fluorescence intensity	mean	std. Dev.
WT tssB-msfgfp	458.191	86.1362
ΔitrA tssB-msfgfp	463.99	5.09612
ΔtslA tssB-msfgfp	482.848	127.26
ΔbfmS tssB-msfgfp	220.193	61.4128
ΔbfmSΔitrA tssB-msfgfp	291.614	22.1897
Figure 5-figure supplement 1B-source data	Provided as Figure 5-supplement 1—source data 1 and Figure 5-supplement 1—source data 2

[truncated: 2 more sheets: Figure 6-figure supplement 1, Figure 7-figure supplement 1]
