# Supplementary figures and images for: Capsular polysaccharide restrains type VI secretion in Acinetobacter baumannii
Source: eLife journal article supplement (doi:10.7554/elife.101032), 2025-01-03

**A**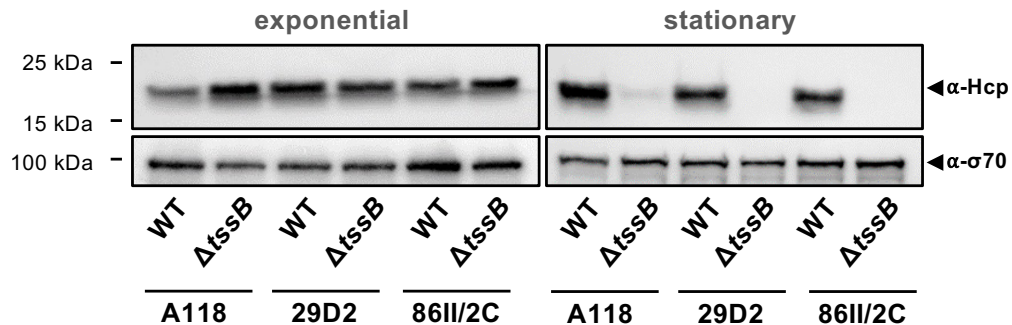**B**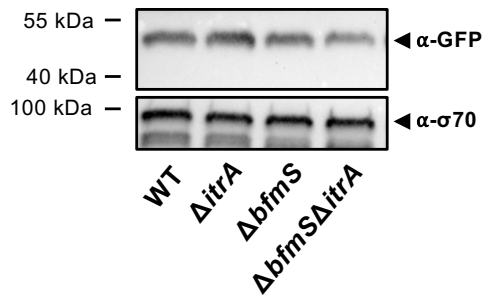**C**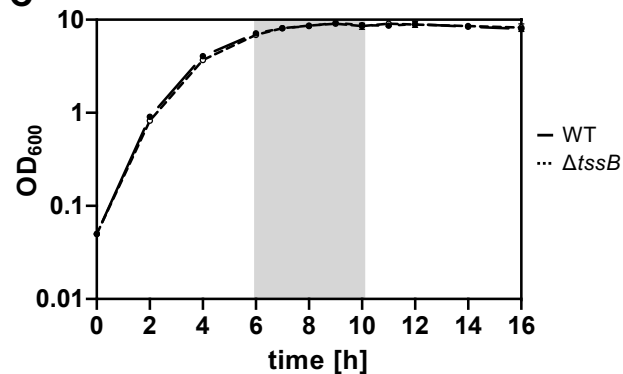

Supplement: supp [file elife-101032-supp-v1.zip]

**A**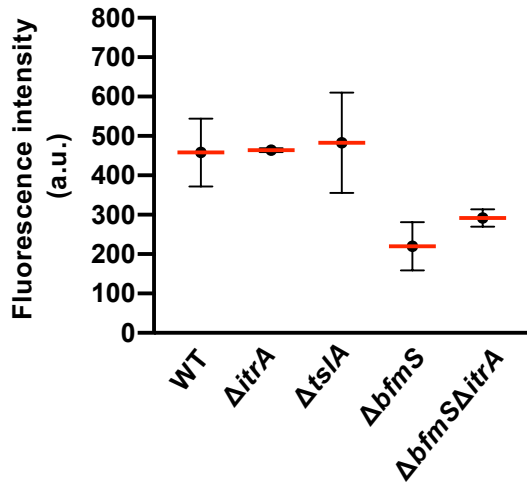**B**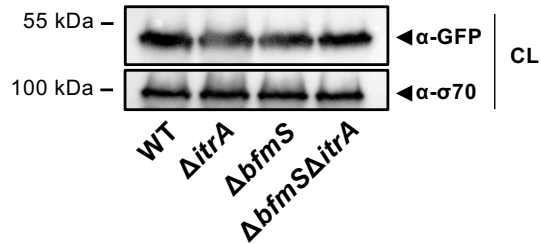

Supplement: supp [file elife-101032-supp-v1.zip]

**A**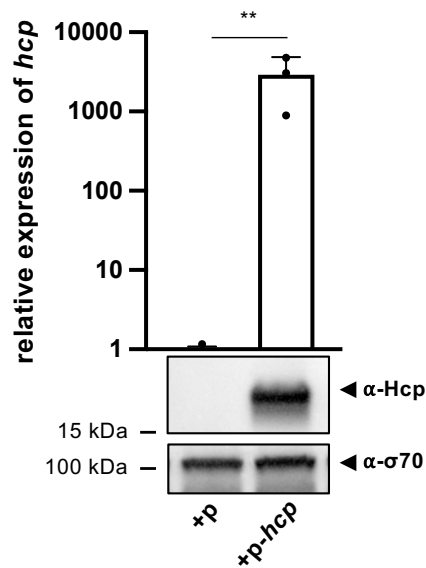**B**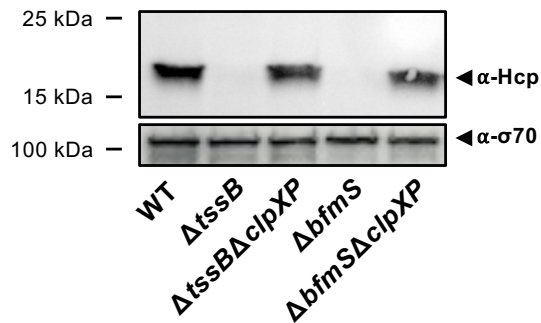**D**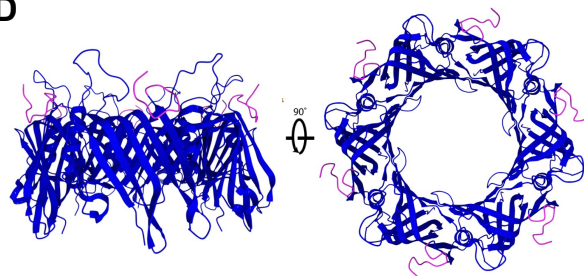**C**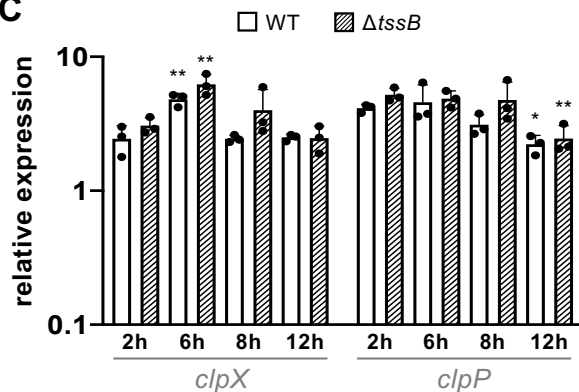**E**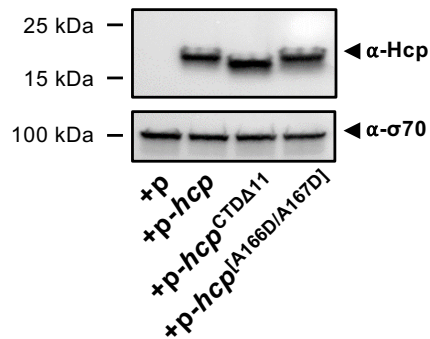

Supplement: supp [file elife-101032-supp-v1.zip]

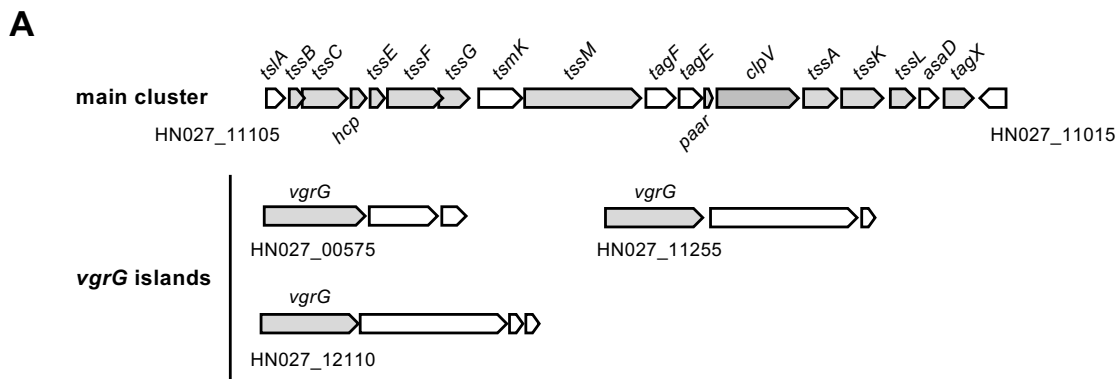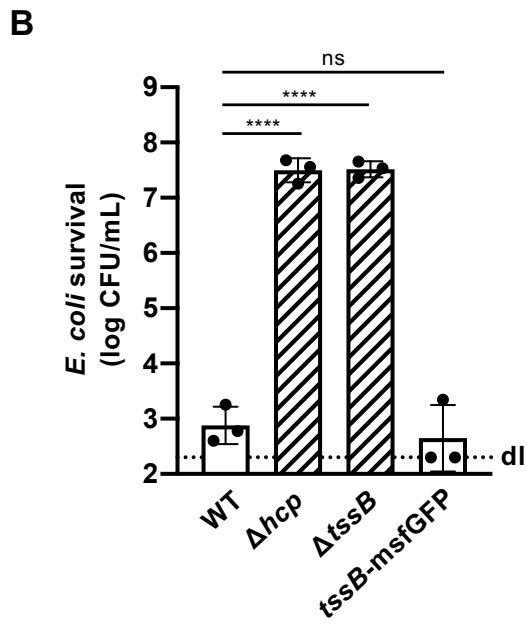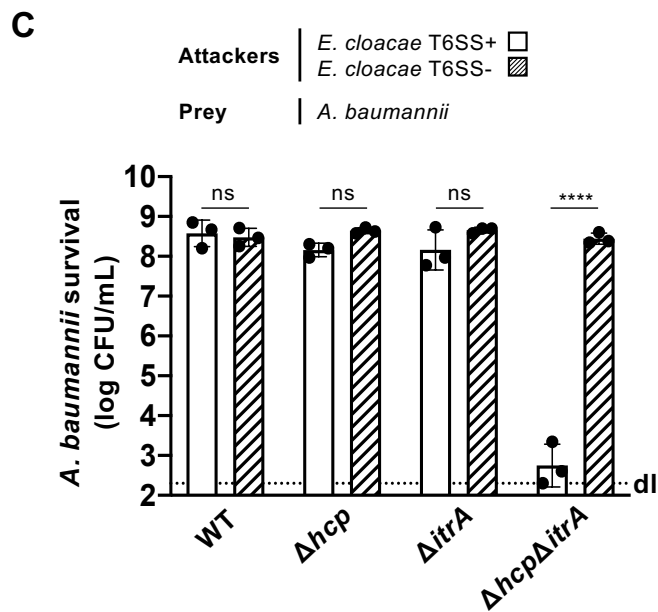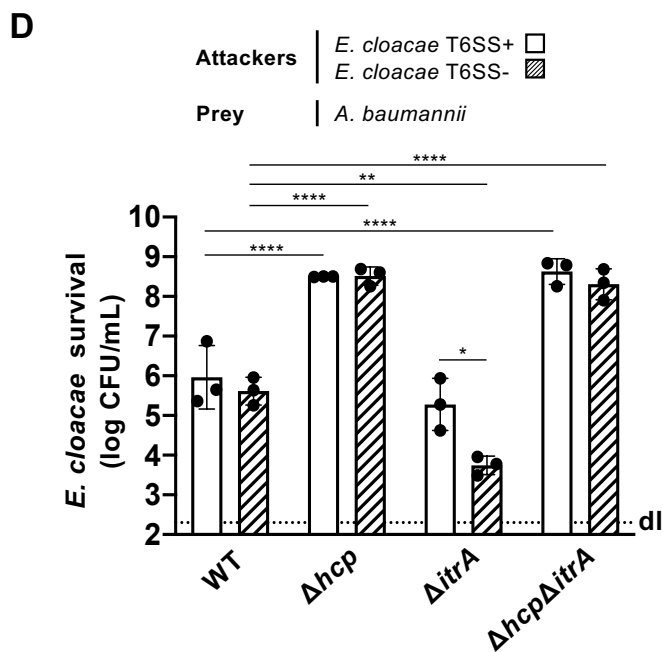

Supplement: supp [file elife-101032-supp-v1.zip]

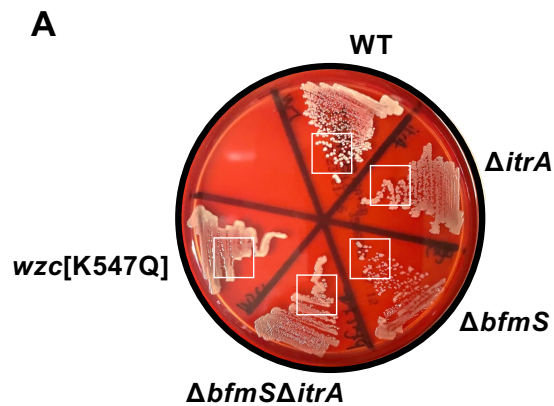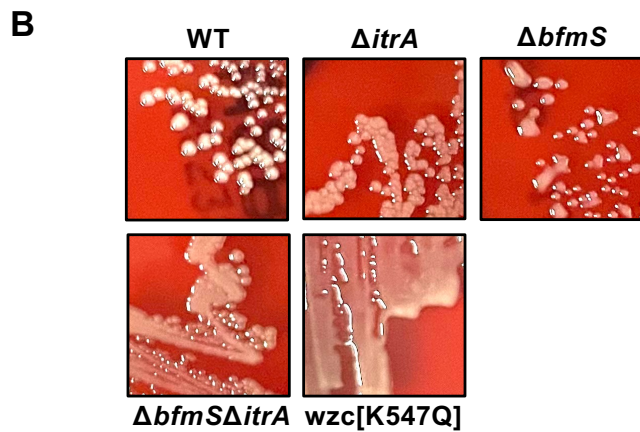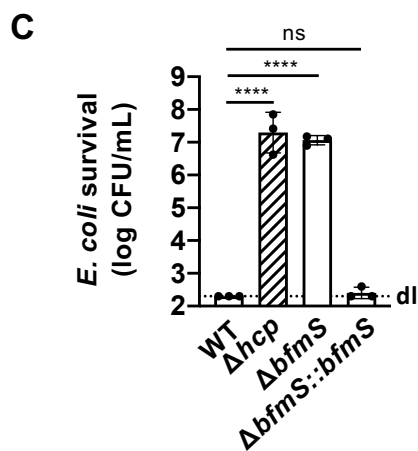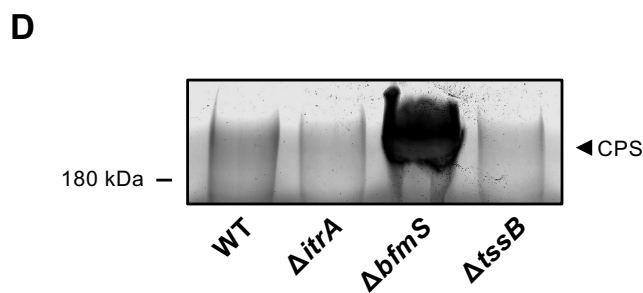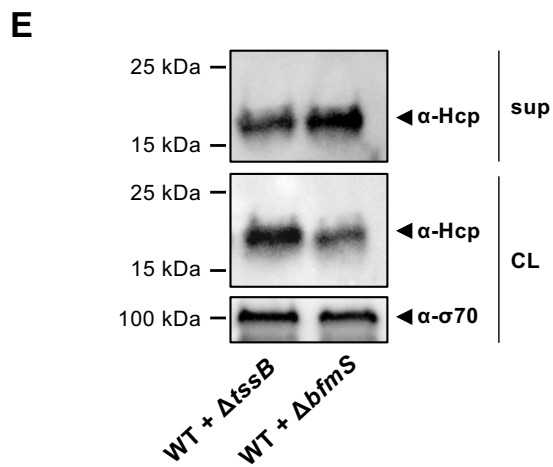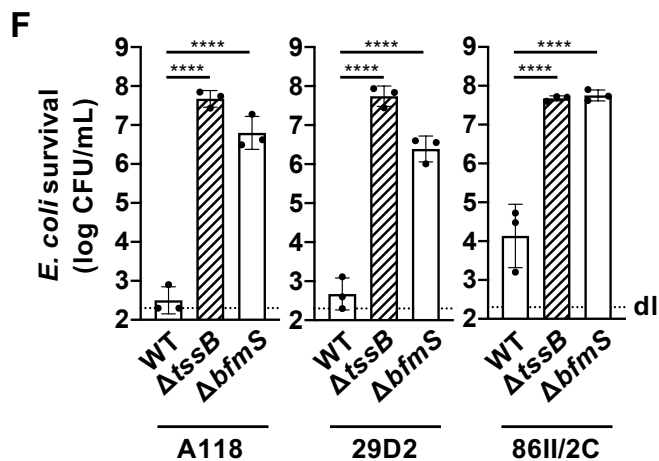

Supplement: supp [file elife-101032-supp-v1.zip]
